# Supplementary material for: In Silico Study on the Interactions, Molecular Docking, Dynamics and Simulation of Potential Compounds from Withania somnifera (L.) Dunal Root against Cancer by Targeting KAT6A
Source: MDPI journal article supplement (doi:10.3390/molecules28031117), 2023-01-22
Supplement: s1 [file s1]

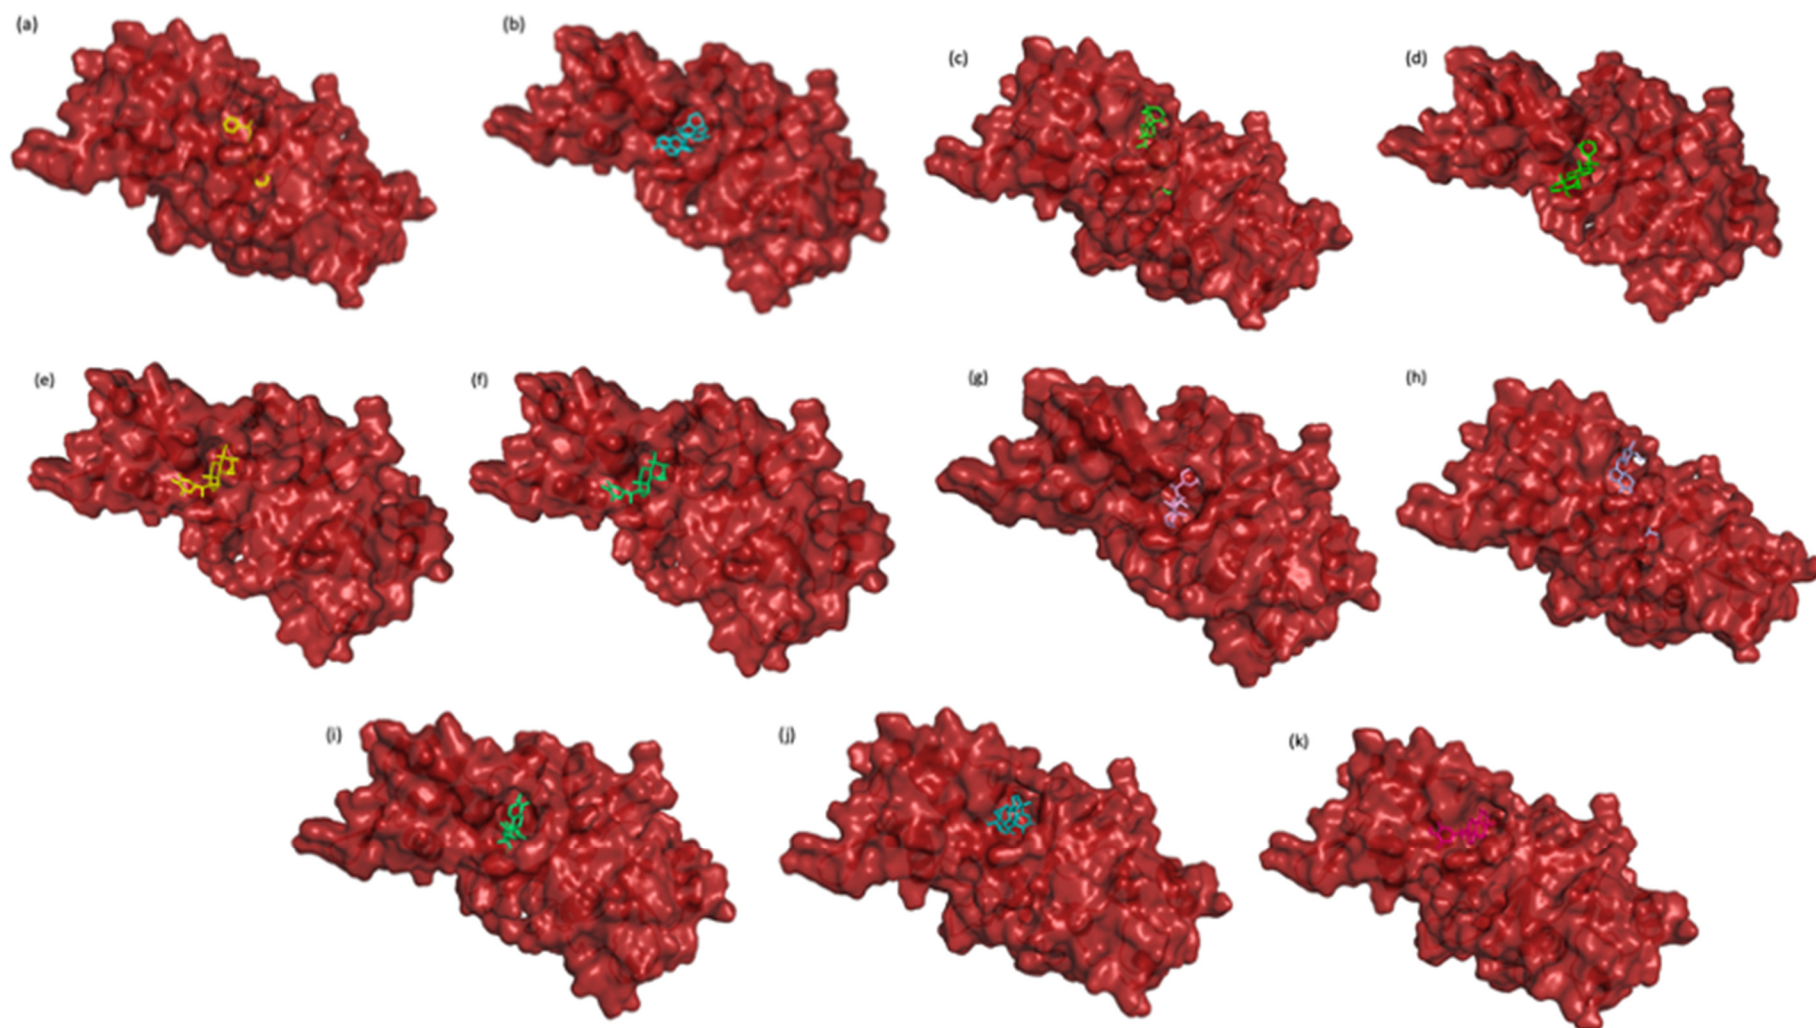

*Supplementary Figure S1: 3D representation of docking complexes of MYST Histone acetyltransferase domain with ligands (a) WM8014 (b) Somniferine (c) Sitoindoside IX (d) Withasomniferol B (e) Withanolide G (f) Withanone (g) Withanolide E (h) Physagulin-d (i) Withasomniferol C (j) Withanolide D (k) 27-Hydroxywithanone*

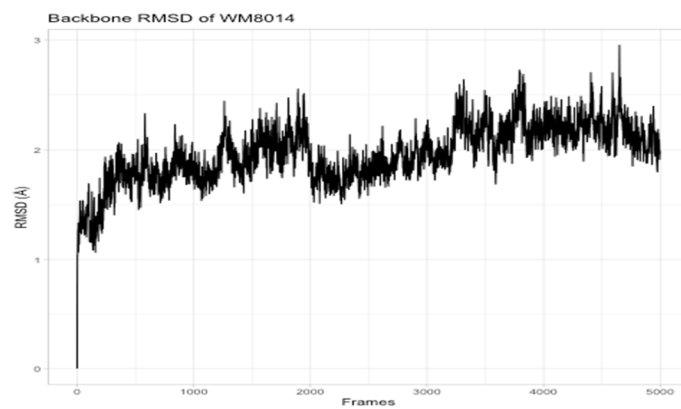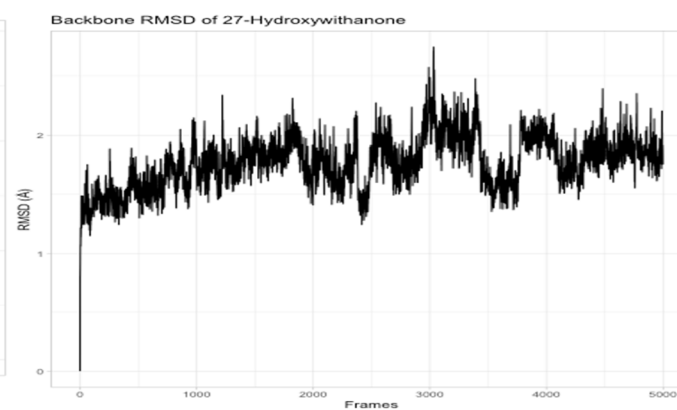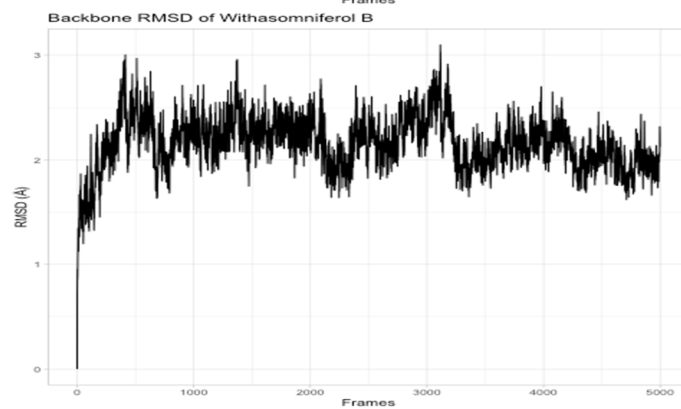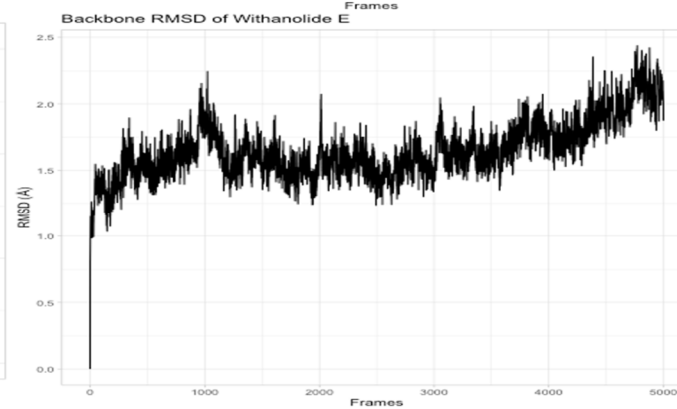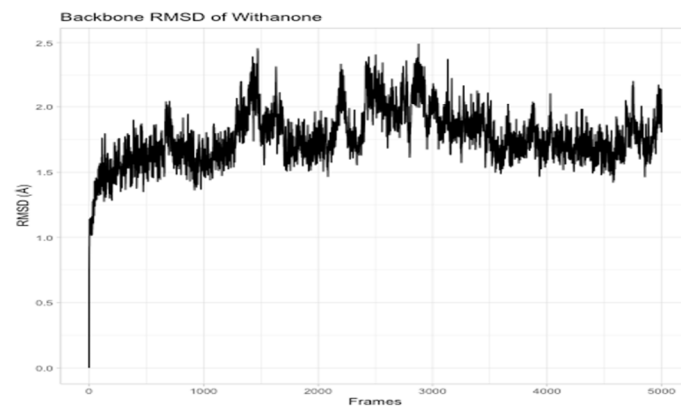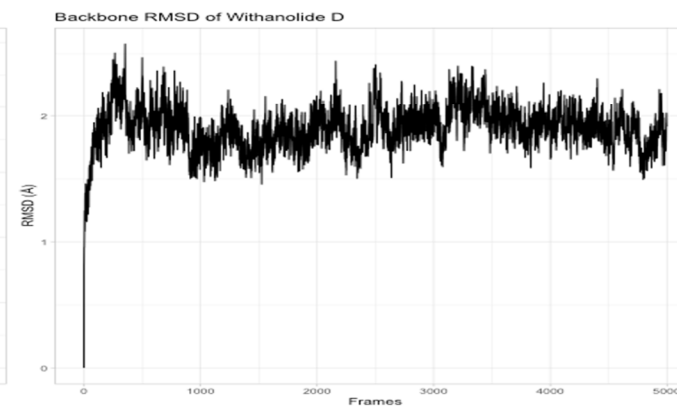

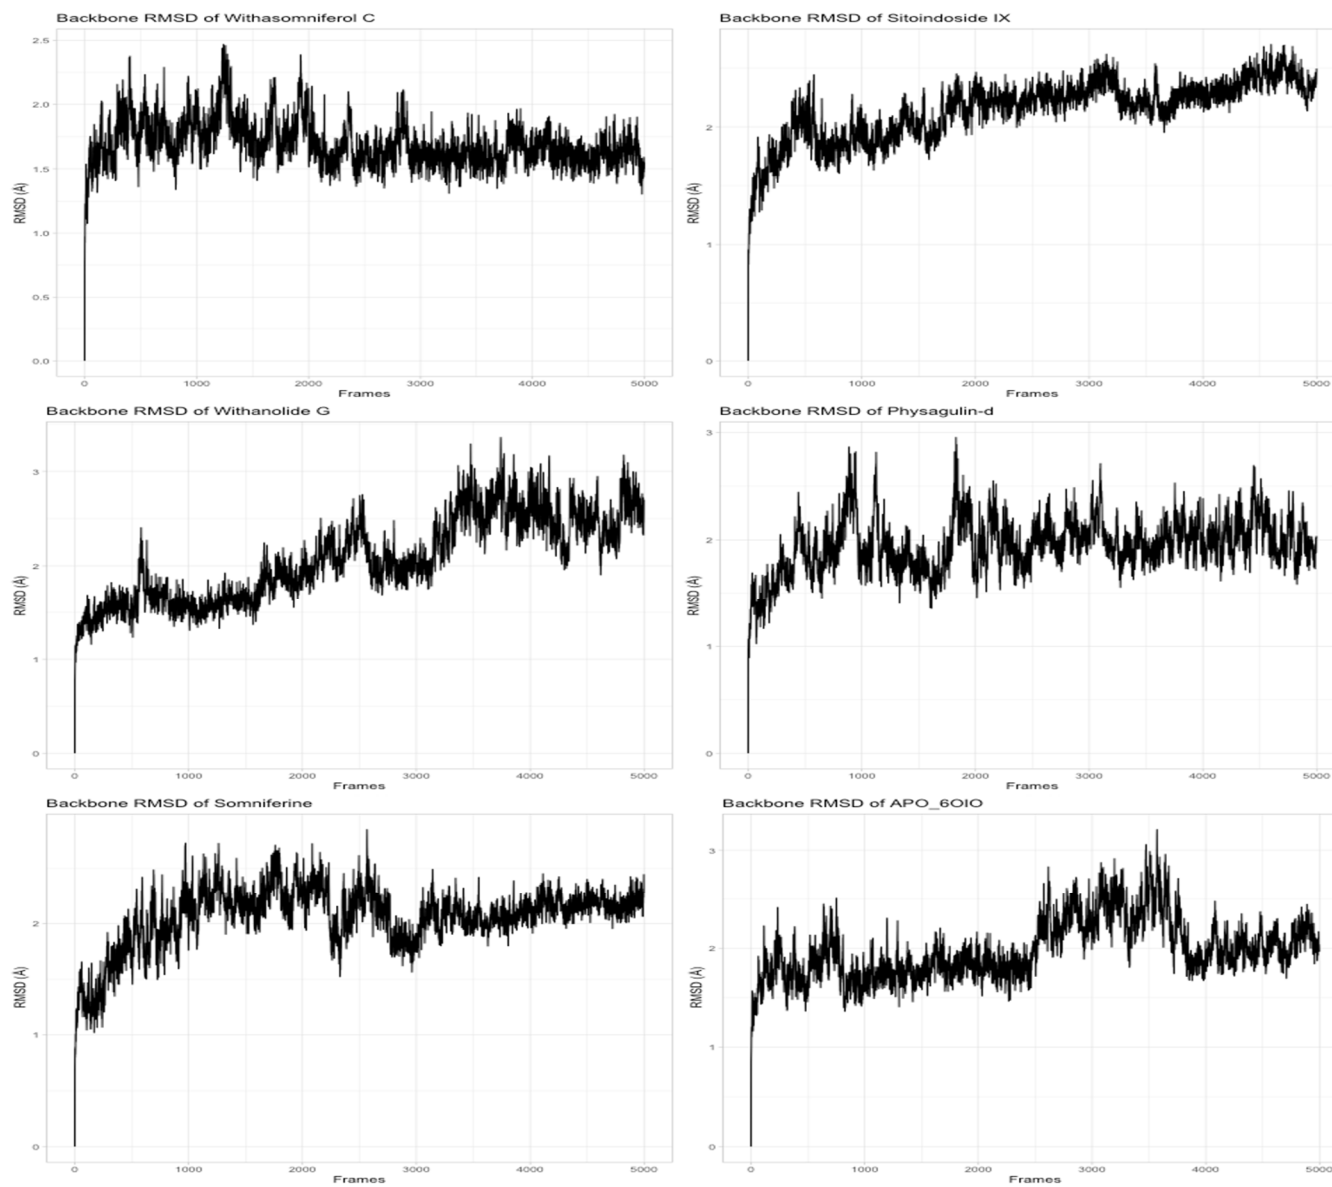

*Supplementary Figure S2: Individual RMSD plots of protein backbone from Molecular dynamics for all the protein-ligand complexes*

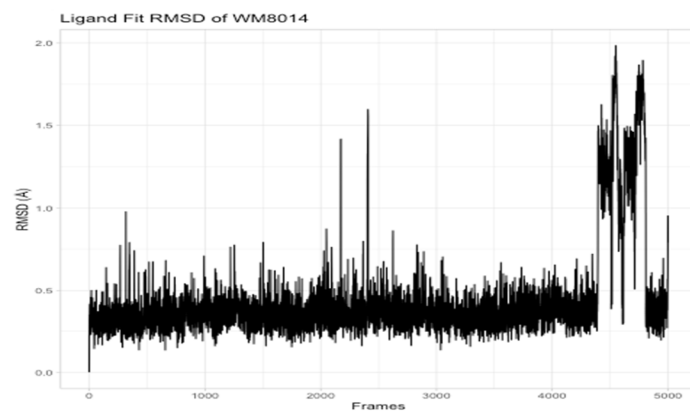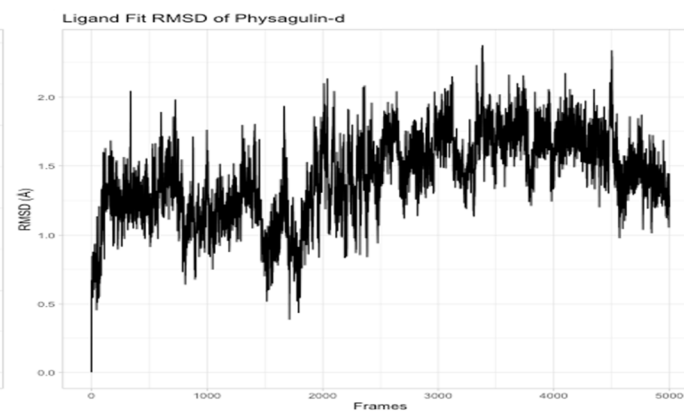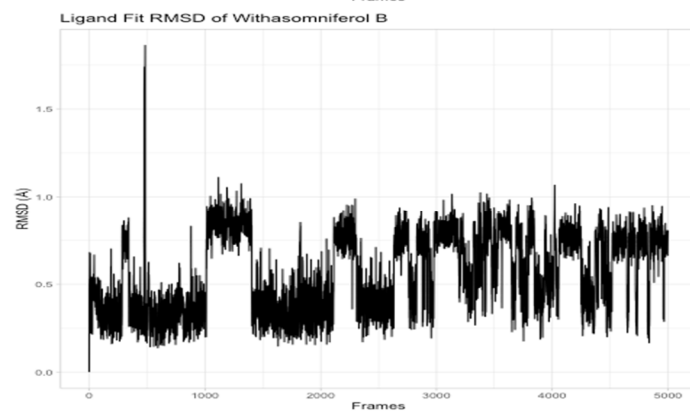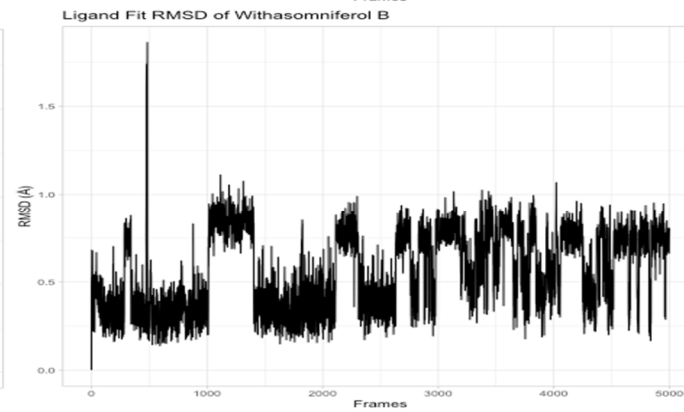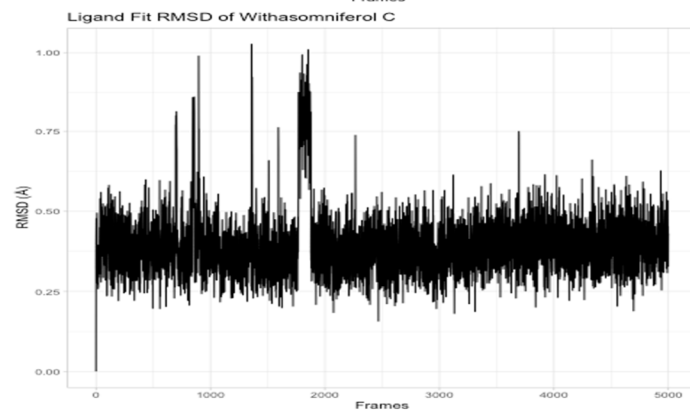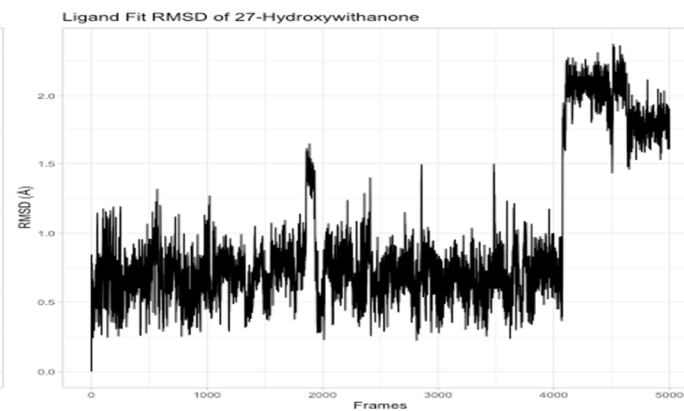

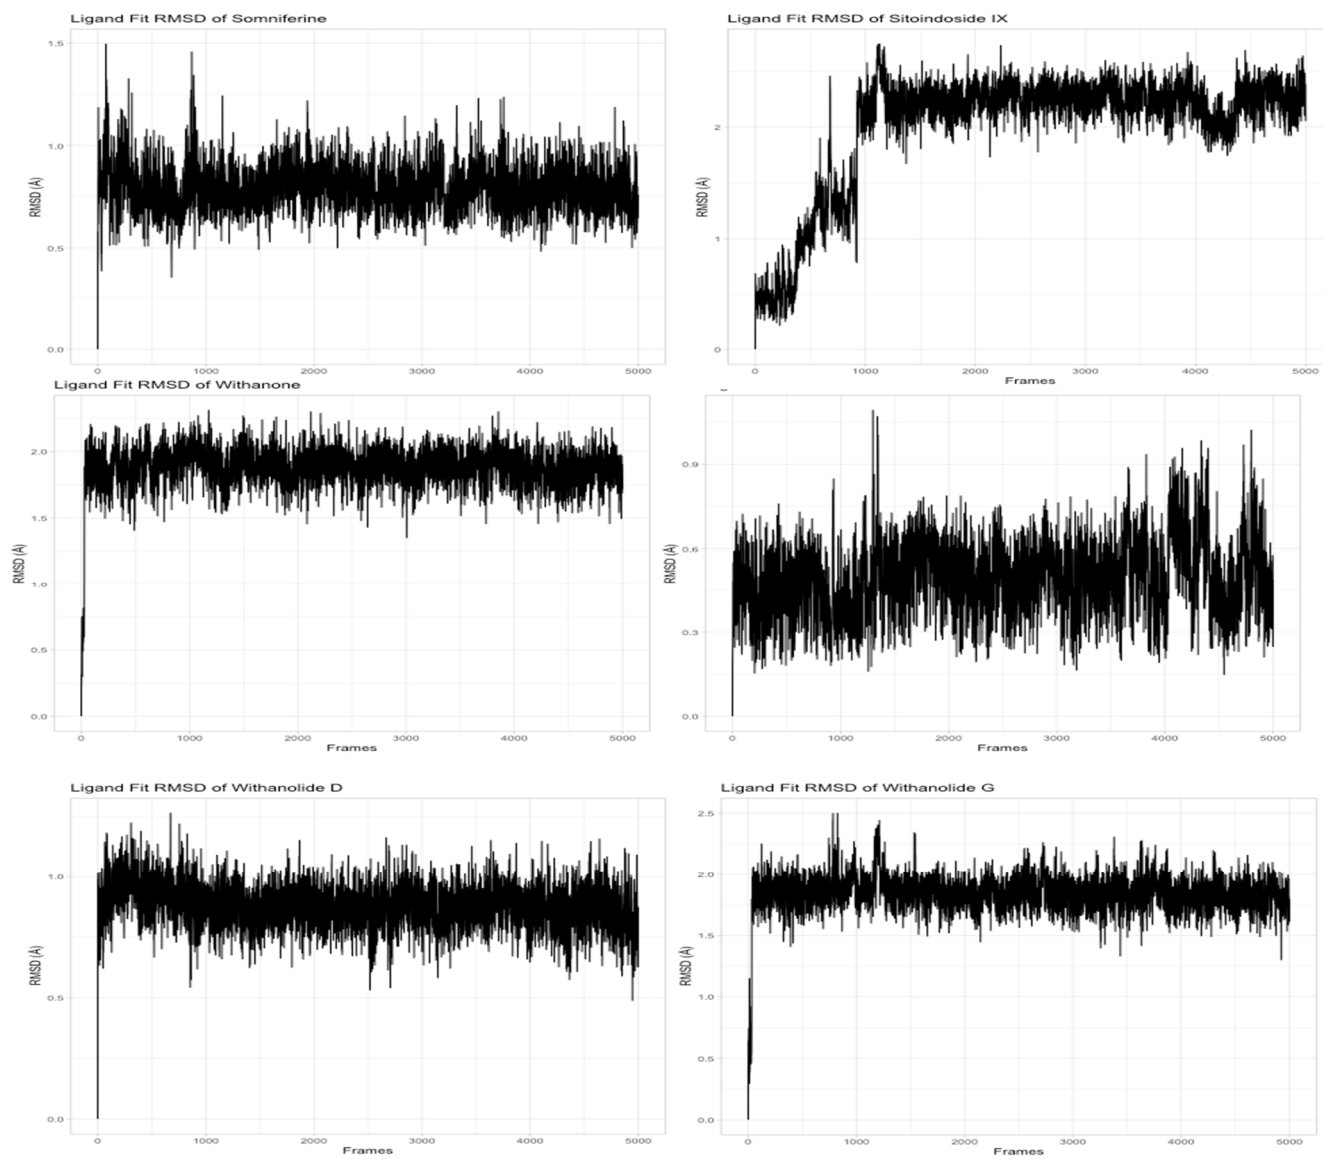

*Supplementary Figure S3: Individual RMSD plot for ligands from Molecular dynamics for all the phytocompounds and the inhibitor*

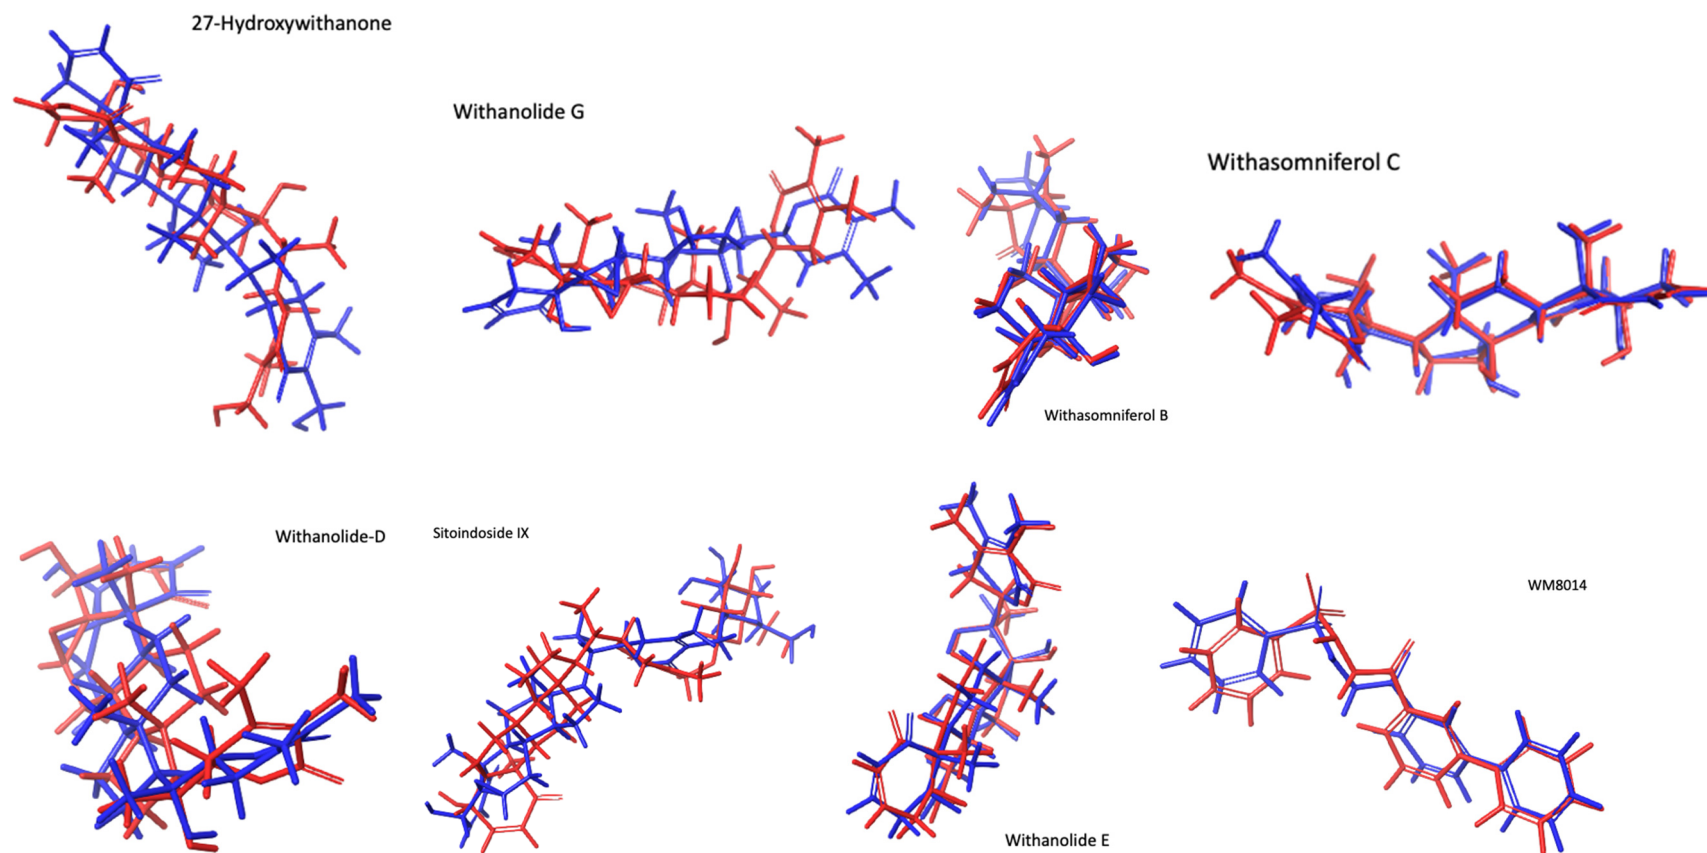

Supplementary Figure S4: Superimposed structures of compounds (First and last frame of molecular dynamics) from *Withania somnifera* which showed promising results with RMSF values.

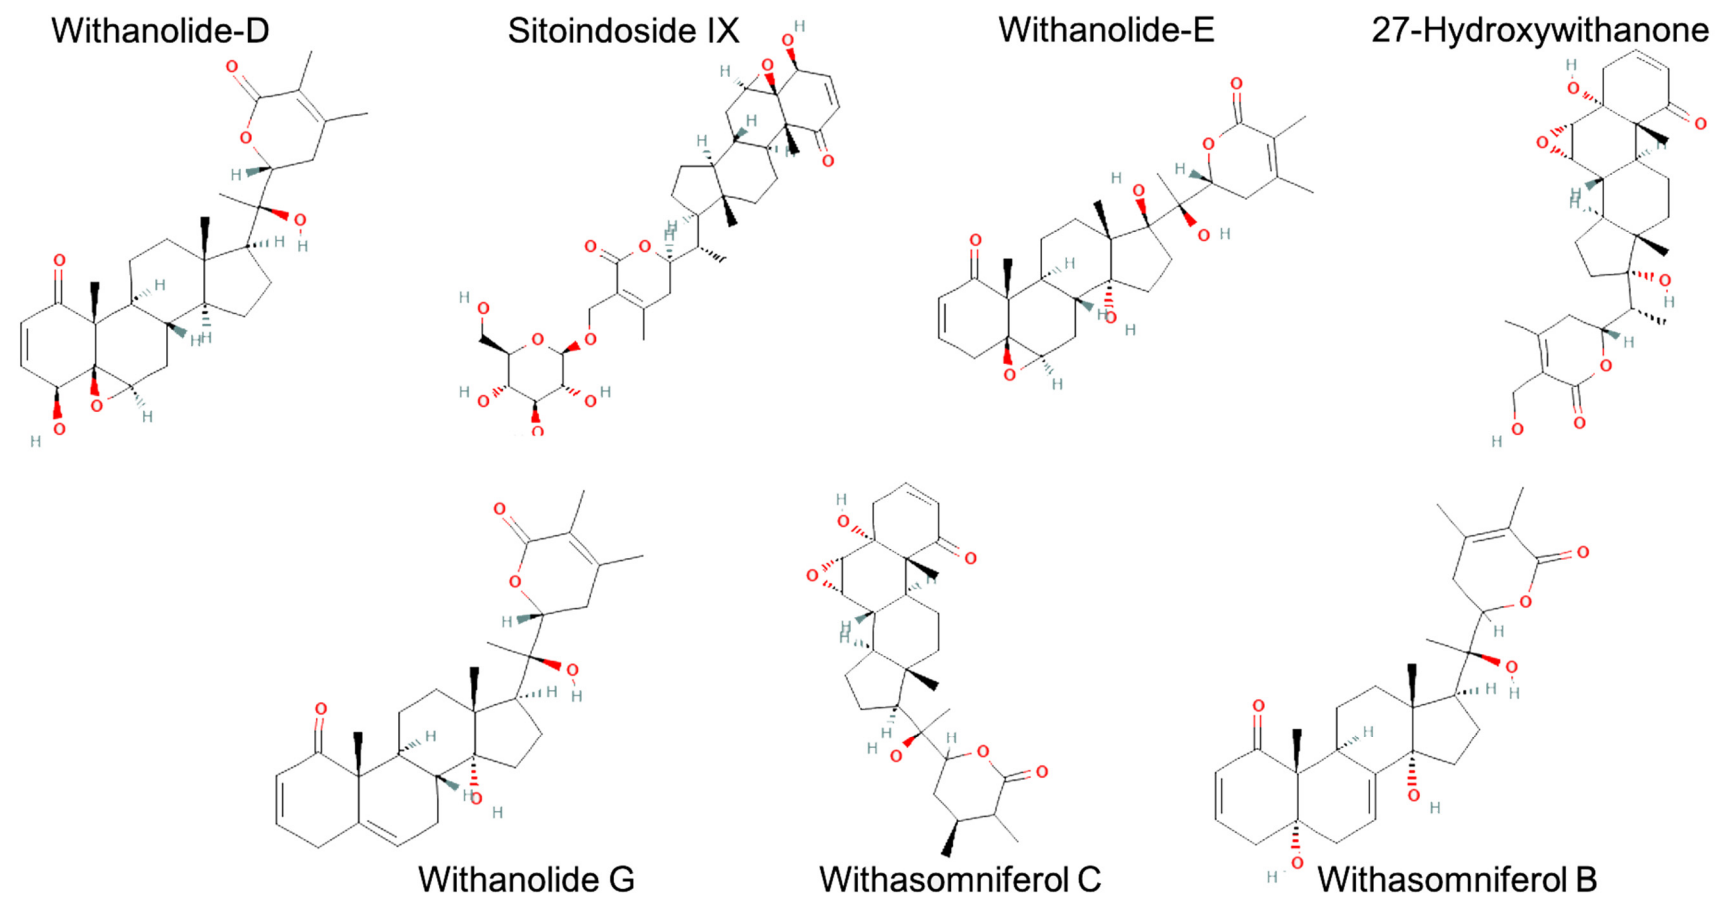

Supplementary Figure S5: 2D structures of compounds) from *Withania somnifera* subjected to molecular dynamics.

## Backbone RMSD

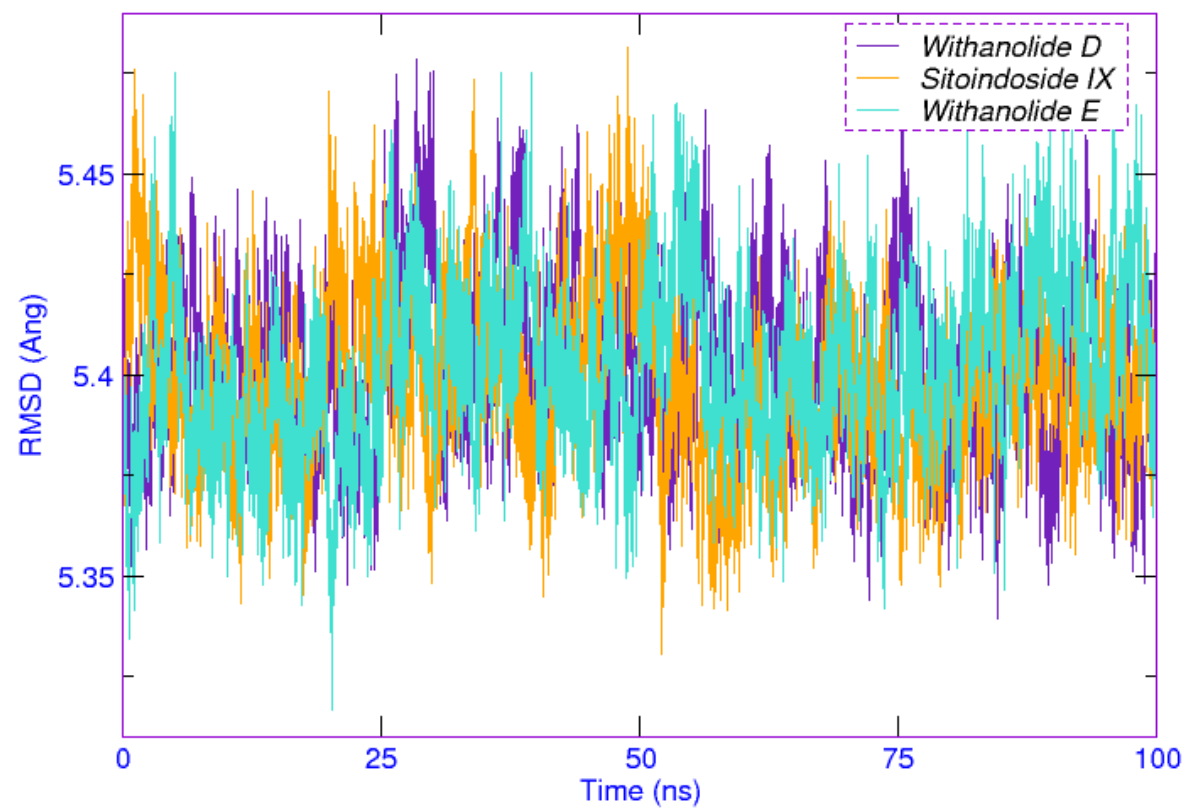

*Supplementary Figure S6:* RMSD plots of Withanolide D, Withanolide E and Sitoindoside IX in complex KAT6A systems for duration of 100 ns.



*Supplementary TableS1: Predicted physicochemical properties of phytochemicals and standard drug.*

| Name                | Molecular weight | Log P   | Surface Area | Water solubility | Caco2 permeability | Intestinal absorption (human) | VDss (human) | Fraction unbound (human) | BBB permeability | CNS permeability | Total Clearance | Oral Rat Acute Toxicity (LD50) | Hepatotoxicity |
|---------------------|------------------|---------|--------------|------------------|--------------------|-------------------------------|--------------|--------------------------|------------------|------------------|-----------------|--------------------------------|----------------|
| Somniferine         | 608.691          | 2.6981  | 260.855      | -3.12            | 1.53               | 94.052                        | 1.633        | 0.262                    | -0.548           | -3.073           | 1.051           | 3.111                          | No             |
| Sitoundoside IX     | 632.747          | 1.1771  | 263.111      | -4.419           | 0.412              | 55.154                        | -0.626       | 0.317                    | -1.183           | -3.703           | 0.459           | 3.891                          | No             |
| Withasomniferol B   | 472.622          | 3.4312  | 202.007      | -4.674           | 0.87               | 100                           | -0.173       | 0.09                     | -0.254           | -2.613           | 0.292           | 3.009                          | No             |
| Withanolide G       | 454.607          | 4.4283  | 196.52       | -5.463           | 0.977              | 95.969                        | 0.221        | 0.131                    | -0.191           | -2.894           | 0.434           | 2.108                          | No             |
| Withanone           | 470.606          | 3.4954  | 201.317      | -5.127           | 0.849              | 100                           | 0.081        | 0.154                    | -0.259           | -2.719           | 0.385           | 2.907                          | No             |
| Withanolide E       | 486.605          | 2.7544  | 206.111      | -5.252           | 0.742              | 100                           | 0.093        | 0.286                    | -0.956           | -3.098           | 0.378           | 3.503                          | No             |
| Physagulin-d        | 620.78           | 1.9817  | 259.636      | -3.959           | 0.429              | 54.898                        | -0.813       | 0.292                    | -1.066           | -3.532           | 0.615           | 2.773                          | No             |
| Withasomniferol C   | 470.606          | 3.5432  | 201.314      | -5.269           | 0.769              | 97.917                        | 0.142        | 0.23                     | -0.774           | -3.008           | 0.43            | 2.334                          | No             |
| Withanolide D       | 470.606          | 3.4954  | 201.317      | -5.127           | 0.831              | 99.2                          | -0.048       | 0.093                    | -0.315           | -2.696           | 0.347           | 2.831                          | No             |
| 27-Hydroxywithanone | 486.605          | 2.4678  | 206.111      | -4.865           | 0.759              | 88.231                        | -0.043       | 0.256                    | -0.548           | -3.022           | 0.456           | 3.314                          | No             |
| Withasomniferol A   | 486.605          | 2.4678  | 206.111      | -4.81            | 0.756              | 88.275                        | -0.249       | 0.195                    | -0.505           | -2.983           | 0.408           | 3.278                          | Yes            |
| Withanolide A       | 470.606          | 3.4954  | 201.317      | -5.096           | 0.846              | 100                           | -0.097       | 0.096                    | -0.255           | -2.681           | 0.337           | 2.913                          | No             |
| Withanoside VI      | 782.921          | -0.0516 | 321.429      | -2.974           | -0.684             | 39.364                        | -0.563       | 0.408                    | -1.595           | -4.412           | 0.544           | 2.875                          | No             |
| Withanoside V       | 766.922          | 0.8335  | 316.635      | -3.056           | -0.579             | 45.414                        | -0.601       | 0.364                    | -1.524           | -4.134           | 0.563           | 2.912                          | No             |
| Withaferin A        | 470.606          | 3.3529  | 201.317      | -5.063           | 0.829              | 85.345                        | -0.131       | 0.105                    | -0.03            | -2.72            | 0.435           | 2.779                          | No             |
| Withanoside IV      | 782.921          | -0.1941 | 321.429      | -2.887           | -0.631             | 31.451                        | -0.605       | 0.398                    | -1.51            | -4.436           | 0.636           | 2.886                          | No             |
| Sitogluside         | 576.859          | 5.849   | 248.833      | -4.741           | 0.472              | 79.677                        | -1.163       | 0.078                    | -0.785           | -3.021           | 0.689           | 2.571                          | No             |
| (-)-Anaferrine      | 224.348          | 1.6199  | 98.368       | -1.204           | 1.336              | 93.738                        | 0.908        | 0.754                    | 0.112            | -3.249           | 1.272           | 2.483                          | No             |

|              |         |         |         |        |        |        |        |       |        |        |       |       |     |
|--------------|---------|---------|---------|--------|--------|--------|--------|-------|--------|--------|-------|-------|-----|
| Withasomnine | 184.242 | 2.4963  | 83.185  | -2.402 | 1.422  | 97.188 | 0.272  | 0.277 | 0.289  | -1.699 | 0.34  | 2.093 | No  |
| Cuscohygrine | 224.348 | 1.5241  | 98.788  | -1.108 | 1.364  | 94.096 | 0.979  | 0.757 | 0.236  | -3.226 | 1.159 | 2.385 | No  |
| Anahygrine   | 224.348 | 1.572   | 98.578  | -1.121 | 1.349  | 93.917 | 0.957  | 0.755 | 0.225  | -3.237 | 1.218 | 2.407 | No  |
| Nicotine     | 162.236 | 1.8483  | 73.23   | -0.872 | 1.671  | 95.867 | 0.595  | 0.628 | 0.208  | -2.995 | 0.86  | 2.432 | Yes |
| Pelletierine | 141.214 | 1.1076  | 61.999  | -0.426 | 1.363  | 97.349 | 0.431  | 0.774 | 0.063  | -2.997 | 1.073 | 2.249 | Yes |
| Hygrine      | 141.214 | 1.0597  | 62.209  | -0.439 | 1.378  | 100    | 0.453  | 0.777 | 0.107  | -2.985 | 1.002 | 2.224 | Yes |
| Tropine      | 141.214 | 0.6039  | 61.836  | -0.514 | 1.444  | 93.575 | 0.54   | 0.796 | -0.023 | -3.339 | 1.063 | 1.91  | Yes |
| Galactitol   | 182.172 | -3.5854 | 69.329  | -1.151 | -0.441 | 25.401 | -0.325 | 0.868 | -1.309 | -4.13  | 0.919 | 1.637 | No  |
| WM8014       | 384.432 | 3.42442 | 156.433 | -5.355 | 1.185  | 92.249 | -1.044 | 0     | 0.066  | -2.304 | 0.451 | 2.017 | Yes |

*Supplementary Table S2: RMSF values of compounds before and after simulation having the best results.*

| <b>Compound Name</b> | <b>RMSF</b> |
|----------------------|-------------|
| Withanolide-D        | 0.8715      |
| Sitoindoside IX      | 2.0561      |
| WITHANOLIDE E        | 0.4904      |
| 27-Hydroxywithanone  | 1.6391      |
| Withanolide G        | 1.7874      |
| Withasomniferol C    | 0.4262      |
| Withasomniferol B    | 0.8036      |
| WM8014               | 1.5051      |
